# Supplementary material for: Tin(iv) and lead(iv) complexes with a tetradentate redox-active ligand
Source: Royal Society of Chemistry journal article supplement (doi:10.1039/c2dt30656e), 2012-01-01
Supplement: c2dt30656e.pdf [file c2dt30656e.pdf]

## Supplementary Material

Optimized coordinates:

### *cis*-H<sub>2</sub>L

|   |           |           |           |
|---|-----------|-----------|-----------|
| C | 5.076561  | -1.260452 | 0.217991  |
| C | 5.546898  | 0.045828  | -0.024380 |
| C | 4.724410  | 1.154641  | -0.257287 |
| C | 3.335485  | 0.915268  | -0.248006 |
| C | 2.819017  | -0.388524 | -0.019509 |
| C | 3.697994  | -1.456123 | 0.215920  |
| O | 2.445443  | 1.912859  | -0.462552 |
| N | 1.426493  | -0.430744 | -0.043060 |
| C | 0.729351  | -1.511973 | 0.002898  |
| C | -0.729345 | -1.511996 | -0.003483 |
| N | -1.426513 | -0.430803 | 0.042918  |
| C | -2.819031 | -0.388555 | 0.019395  |
| C | -3.335450 | 0.915251  | 0.247954  |
| O | -2.445359 | 1.912787  | 0.462515  |
| C | -3.698054 | -1.456129 | -0.215971 |
| C | -5.076615 | -1.260415 | -0.217973 |
| C | -5.546898 | 0.045883  | 0.024393  |
| C | -4.724368 | 1.154674  | 0.257267  |
| C | 6.023329  | -2.447683 | 0.487034  |
| C | 7.508276  | -2.039559 | 0.444954  |
| C | 5.728826  | -3.035887 | 1.887553  |
| C | 5.798612  | -3.541583 | -0.583961 |
| C | 5.296011  | 2.563943  | -0.511472 |
| C | 4.857110  | 3.062636  | -1.910388 |
| C | 4.787112  | 3.541176  | 0.576859  |
| C | 6.836829  | 2.581031  | -0.471402 |
| C | -5.295919 | 2.563986  | 0.511508  |
| C | -4.786959 | 3.541302  | -0.576719 |
| C | -6.836734 | 2.581167  | 0.471397  |
| C | -4.857008 | 3.062541  | 1.910475  |
| C | -6.023434 | -2.447628 | -0.486918 |
| C | -7.508367 | -2.039469 | -0.444699 |
| C | -5.729074 | -3.035842 | -1.887464 |
| C | -5.798646 | -3.541528 | 0.584059  |
| H | 6.615366  | 0.207205  | -0.026099 |
| H | 3.289214  | -2.442572 | 0.413413  |
| H | 1.566735  | 1.470838  | -0.386058 |
| H | 1.191217  | -2.506188 | 0.039175  |
| H | -1.191174 | -2.506212 | -0.040174 |
| H | -3.289325 | -2.442608 | -0.413416 |
| H | -6.615360 | 0.207297  | 0.026149  |
| H | 8.136277  | -2.915932 | 0.641036  |
| H | 7.795475  | -1.641290 | -0.534845 |
| H | 7.747542  | -1.286662 | 1.204514  |
| H | 6.389238  | -3.887493 | 2.092709  |
| H | 5.889199  | -2.284928 | 2.669480  |

|   |           |           |           |
|---|-----------|-----------|-----------|
| H | 4.695506  | -3.388969 | 1.972396  |
| H | 6.459555  | -4.398110 | -0.402191 |
| H | 4.767565  | -3.911145 | -0.579409 |
| H | 6.010078  | -3.155907 | -1.587837 |
| H | 5.261215  | 4.066113  | -2.093255 |
| H | 5.237843  | 2.398435  | -2.695479 |
| H | 3.769955  | 3.110382  | -1.997966 |
| H | 5.186559  | 4.546185  | 0.392593  |
| H | 3.697161  | 3.602536  | 0.584850  |
| H | 5.122332  | 3.222778  | 1.571178  |
| H | 7.190030  | 3.601629  | -0.656295 |
| H | 7.228605  | 2.270232  | 0.504151  |
| H | 7.278026  | 1.937231  | -1.241305 |
| H | -5.186358 | 4.546312  | -0.392349 |
| H | -3.697008 | 3.602610  | -0.584705 |
| H | -5.122198 | 3.223030  | -1.571073 |
| H | -7.189877 | 3.601780  | 0.656318  |
| H | -7.228496 | 2.270427  | -0.504180 |
| H | -7.277999 | 1.937371  | 1.241264  |
| H | -5.261137 | 4.065986  | 2.093461  |
| H | -5.237695 | 2.398237  | 2.695500  |
| H | -3.769849 | 3.110306  | 1.998018  |
| H | -8.136408 | -2.915829 | -0.640710 |
| H | -7.795459 | -1.641180 | 0.535124  |
| H | -7.747691 | -1.286575 | -1.204245 |
| H | -6.389530 | -3.887429 | -2.092562 |
| H | -5.889492 | -2.284879 | -2.669377 |
| H | -4.695771 | -3.388953 | -1.972395 |
| H | -6.459623 | -4.398042 | 0.402346  |
| H | -4.767609 | -3.911116 | 0.579422  |
| H | -6.010018 | -3.155847 | 1.587953  |
| H | -1.566669 | 1.470715  | 0.386009  |

***trans*-H<sub>2</sub>L**

|   |           |           |           |
|---|-----------|-----------|-----------|
| C | 4.868299  | 1.421520  | 0.131814  |
| C | 5.736611  | 0.318965  | 0.007926  |
| C | 5.316658  | -1.011956 | -0.106260 |
| C | 3.924808  | -1.231924 | -0.091289 |
| C | 3.014266  | -0.148406 | 0.021705  |
| C | 3.500172  | 1.162271  | 0.134523  |
| O | 3.407599  | -2.481098 | -0.190552 |
| N | 1.678056  | -0.552089 | 0.015903  |
| C | 0.675464  | 0.258811  | 0.023674  |
| C | -0.675463 | -0.258839 | 0.023687  |
| N | -1.678052 | 0.552065  | 0.015888  |
| C | -3.014265 | 0.148391  | 0.021709  |
| C | -3.924801 | 1.231915  | -0.091280 |
| O | -3.407580 | 2.481081  | -0.190572 |
| C | -3.500180 | -1.162282 | 0.134524  |
| C | -4.868310 | -1.421520 | 0.131827  |

|   |           |           |           |
|---|-----------|-----------|-----------|
| C | -5.736616 | -0.318961 | 0.007947  |
| C | -5.316654 | 1.011958  | -0.106246 |
| C | 5.378510  | 2.870634  | 0.264777  |
| C | 6.916320  | 2.960231  | 0.232282  |
| C | 4.825440  | 3.723197  | -0.901891 |
| C | 4.893259  | 3.466867  | 1.607564  |
| C | 6.314618  | -2.179214 | -0.245402 |
| C | 6.142866  | -3.164347 | 0.937223  |
| C | 6.070830  | -2.918911 | -1.583969 |
| C | 7.777967  | -1.694255 | -0.240617 |
| C | -6.314602 | 2.179227  | -0.245399 |
| C | -6.070793 | 2.918926  | -1.583964 |
| C | -7.777957 | 1.694289  | -0.240631 |
| C | -6.142850 | 3.164353  | 0.937229  |
| C | -5.378529 | -2.870632 | 0.264774  |
| C | -6.916341 | -2.960212 | 0.232290  |
| C | -4.825478 | -3.723181 | -0.901914 |
| C | -4.893274 | -3.466891 | 1.607547  |
| H | 6.800131  | 0.509535  | 0.002192  |
| H | 2.793042  | 1.980216  | 0.232951  |
| H | 2.433396  | -2.342084 | -0.145703 |
| H | 0.771340  | 1.350005  | 0.026547  |
| H | -0.771343 | -1.350032 | 0.026599  |
| H | -2.793058 | -1.980237 | 0.232929  |
| H | -6.800137 | -0.509523 | 0.002214  |
| H | 7.224888  | 4.007590  | 0.325263  |
| H | 7.376429  | 2.407063  | 1.058993  |
| H | 7.329264  | 2.577586  | -0.708073 |
| H | 5.176518  | 4.759211  | -0.819471 |
| H | 5.157275  | 3.327471  | -1.868521 |
| H | 3.730383  | 3.744050  | -0.908728 |
| H | 5.241281  | 4.501545  | 1.716500  |
| H | 3.800318  | 3.474982  | 1.678648  |
| H | 5.278024  | 2.887677  | 2.454714  |
| H | 6.854008  | -3.993786 | 0.837904  |
| H | 6.342155  | -2.662811 | 1.891764  |
| H | 5.134237  | -3.580798 | 0.972169  |
| H | 6.774825  | -3.754540 | -1.683032 |
| H | 5.056279  | -3.317526 | -1.644960 |
| H | 6.228283  | -2.243939 | -2.433731 |
| H | 8.443461  | -2.558238 | -0.346289 |
| H | 7.989922  | -1.013471 | -1.073238 |
| H | 8.043404  | -1.188147 | 0.694909  |
| H | -6.774791 | 3.754552  | -1.683042 |
| H | -5.056243 | 3.317545  | -1.644936 |
| H | -6.228228 | 2.243950  | -2.433725 |
| H | -8.443440 | 2.558281  | -0.346300 |
| H | -7.989913 | 1.013514  | -1.073260 |
| H | -8.043409 | 1.188176  | 0.694888  |
| H | -6.853984 | 3.993799  | 0.837911  |
| H | -6.342146 | 2.662815  | 1.891768  |
| H | -5.134217 | 3.580795  | 0.972182  |

|   |           |           |           |
|---|-----------|-----------|-----------|
| H | -7.224920 | -4.007569 | 0.325258  |
| H | -7.376436 | -2.407051 | 1.059013  |
| H | -7.329288 | -2.577548 | -0.708055 |
| H | -5.176561 | -4.759194 | -0.819506 |
| H | -5.157321 | -3.327438 | -1.868534 |
| H | -3.730421 | -3.744040 | -0.908764 |
| H | -5.241307 | -4.501566 | 1.716470  |
| H | -3.800332 | -3.475022 | 1.678623  |
| H | -5.278023 | -2.887708 | 2.454709  |
| H | -2.433376 | 2.342057  | -0.145740 |

## 1

|    |           |           |           |
|----|-----------|-----------|-----------|
| Sn | -0.000010 | -0.862370 | 0.000036  |
| O  | 2.188166  | -1.519835 | -0.000109 |
| O  | -2.188177 | -1.519837 | 0.000195  |
| N  | 1.349506  | 1.005072  | 0.000085  |
| N  | -1.349515 | 1.005071  | 0.000067  |
| C  | 3.100953  | -0.596067 | -0.000031 |
| C  | 2.711565  | 0.793721  | 0.000057  |
| C  | 3.675953  | 1.830552  | 0.000083  |
| H  | 3.337858  | 2.860666  | 0.000112  |
| C  | 5.025934  | 1.541220  | 0.000074  |
| C  | 5.400812  | 0.163026  | 0.000003  |
| H  | 6.461365  | -0.059839 | -0.000014 |
| C  | 4.514061  | -0.900957 | -0.000059 |
| C  | 6.120050  | 2.622830  | 0.000081  |
| C  | 7.004188  | 2.470872  | -1.263098 |
| H  | 6.407683  | 2.586027  | -2.174845 |
| H  | 7.492695  | 1.492563  | -1.306988 |
| H  | 7.791351  | 3.234234  | -1.272926 |
| C  | 7.004140  | 2.470952  | 1.263292  |
| H  | 6.407604  | 2.586132  | 2.175017  |
| H  | 7.791280  | 3.234338  | 1.273118  |
| H  | 7.492682  | 1.492665  | 1.307256  |
| C  | 5.532576  | 4.048110  | 0.000023  |
| H  | 4.920152  | 4.238327  | 0.888500  |
| H  | 4.920187  | 4.238270  | -0.888489 |
| H  | 6.344534  | 4.783385  | 0.000017  |
| C  | 4.992432  | -2.365969 | -0.000152 |
| C  | 4.471949  | -3.090568 | -1.267702 |
| H  | 4.856786  | -2.610914 | -2.175468 |
| H  | 3.381762  | -3.085242 | -1.309588 |
| H  | 4.812958  | -4.133139 | -1.269510 |
| C  | 4.471882  | -3.090767 | 1.267254  |
| H  | 4.856628  | -2.611225 | 2.175119  |
| H  | 4.812938  | -4.133322 | 1.268944  |
| H  | 3.381691  | -3.085503 | 1.309058  |
| C  | 6.531358  | -2.476719 | -0.000118 |
| H  | 6.980973  | -2.019597 | 0.888721  |
| H  | 6.981020  | -2.019527 | -0.888897 |

|   |           |           |           |
|---|-----------|-----------|-----------|
| H | 6.816616  | -3.534319 | -0.000155 |
| C | 0.714423  | 2.156058  | 0.000141  |
| H | 1.239317  | 3.109584  | 0.000194  |
| C | -0.714433 | 2.156057  | 0.000129  |
| H | -1.239327 | 3.109583  | 0.000184  |
| C | -3.100964 | -0.596068 | 0.000100  |
| C | -2.711576 | 0.793720  | 0.000048  |
| C | -3.675964 | 1.830550  | -0.000012 |
| H | -3.337871 | 2.860666  | -0.000042 |
| C | -5.025944 | 1.541217  | -0.000037 |
| C | -5.400822 | 0.163024  | -0.000010 |
| H | -6.461373 | -0.059841 | -0.000066 |
| C | -4.514069 | -0.900960 | 0.000059  |
| C | -6.120047 | 2.622837  | -0.000166 |
| C | -5.532532 | 4.048101  | -0.000612 |
| H | -6.344470 | 4.783397  | -0.000508 |
| H | -4.920390 | 4.238106  | -0.889328 |
| H | -4.919849 | 4.238428  | 0.887662  |
| C | -7.004317 | 2.470602  | -1.263214 |
| H | -7.492819 | 1.492278  | -1.306844 |
| H | -6.407913 | 2.585565  | -2.175052 |
| H | -7.791490 | 3.233954  | -1.273126 |
| C | -7.004006 | 2.471283  | 1.263183  |
| H | -7.492619 | 1.493044  | 1.307406  |
| H | -7.791087 | 3.234731  | 1.272938  |
| H | -6.407356 | 2.586609  | 2.174814  |
| C | -4.992427 | -2.365978 | 0.000080  |
| C | -6.531351 | -2.476763 | -0.000012 |
| H | -6.981055 | -2.019595 | 0.888758  |
| H | -6.816583 | -3.534369 | 0.000000  |
| H | -6.980948 | -2.019639 | -0.888860 |
| C | -4.471974 | -3.090630 | 1.267609  |
| H | -4.856858 | -2.611036 | 2.175387  |
| H | -3.381789 | -3.085277 | 1.309538  |
| H | -4.812957 | -4.133209 | 1.269346  |
| C | -4.471816 | -3.090707 | -1.267342 |
| H | -3.381624 | -3.085424 | -1.309098 |
| H | -4.856530 | -2.611125 | -2.175199 |
| H | -4.812856 | -4.133268 | -1.269097 |
| C | -0.000209 | -1.445992 | 2.086102  |
| H | 0.899720  | -1.064991 | 2.573014  |
| H | -0.002767 | -2.537234 | 2.147613  |
| H | -0.898042 | -1.060902 | 2.573697  |
| C | 0.000217  | -1.445946 | -2.086040 |
| H | 0.897975  | -1.060700 | -2.573651 |
| H | -0.899784 | -1.065086 | -2.572927 |
| H | 0.002961  | -2.537186 | -2.147567 |

**1<sup>+</sup>**

|    |           |          |           |
|----|-----------|----------|-----------|
| Sn | 0.000010  | 0.898131 | 0.000015  |
| O  | -2.264209 | 1.524973 | -0.000141 |

|   |           |           |           |
|---|-----------|-----------|-----------|
| O | 2.264226  | 1.524974  | 0.000171  |
| N | -1.353105 | -0.956166 | -0.000016 |
| N | 1.353123  | -0.956168 | 0.000047  |
| C | -3.148098 | 0.610022  | -0.000120 |
| C | -2.703775 | -0.796573 | -0.000045 |
| C | -3.649750 | -1.847544 | -0.000003 |
| H | -3.307030 | -2.874453 | 0.000058  |
| C | -5.002448 | -1.571010 | -0.000001 |
| C | -5.421446 | -0.187939 | -0.000068 |
| H | -6.487965 | -0.003624 | -0.000043 |
| C | -4.577889 | 0.895703  | -0.000154 |
| C | -6.076436 | -2.664291 | 0.000079  |
| C | -6.959218 | -2.511656 | -1.266753 |
| H | -6.364172 | -2.619020 | -2.179873 |
| H | -7.469162 | -1.544804 | -1.307981 |
| H | -7.730703 | -3.288560 | -1.273396 |
| C | -6.959069 | -2.511618 | 1.267011  |
| H | -6.363912 | -2.618942 | 2.180063  |
| H | -7.730545 | -3.288530 | 1.273777  |
| H | -7.469019 | -1.544770 | 1.308265  |
| C | -5.473297 | -4.082371 | 0.000065  |
| H | -4.862988 | -4.270868 | 0.890235  |
| H | -4.863133 | -4.270913 | -0.890195 |
| H | -6.279218 | -4.822213 | 0.000149  |
| C | -5.083870 | 2.348335  | -0.000180 |
| C | -4.579214 | 3.081492  | -1.270475 |
| H | -4.937348 | 2.585242  | -2.179508 |
| H | -3.489690 | 3.130563  | -1.307642 |
| H | -4.964247 | 4.106777  | -1.278731 |
| C | -4.578945 | 3.081607  | 1.269938  |
| H | -4.936824 | 2.585397  | 2.179092  |
| H | -4.964038 | 4.106869  | 1.278218  |
| H | -3.489413 | 3.130749  | 1.306828  |
| C | -6.625038 | 2.414770  | -0.000023 |
| H | -7.062303 | 1.948390  | 0.889731  |
| H | -7.062476 | 1.948793  | -0.889900 |
| H | -6.937824 | 3.463201  | 0.000240  |
| C | -0.700955 | -2.123163 | 0.000002  |
| H | -1.227826 | -3.073311 | -0.000011 |
| C | 0.700971  | -2.123164 | 0.000024  |
| H | 1.227839  | -3.073314 | 0.000030  |
| C | 3.148112  | 0.610020  | 0.000153  |
| C | 2.703793  | -0.796575 | 0.000076  |
| C | 3.649772  | -1.847542 | 0.000025  |
| H | 3.307058  | -2.874453 | -0.000046 |
| C | 5.002469  | -1.571001 | 0.000021  |
| C | 5.421463  | -0.187929 | 0.000070  |
| H | 6.487980  | -0.003610 | 0.000009  |
| C | 4.577897  | 0.895709  | 0.000167  |
| C | 6.076458  | -2.664282 | -0.000113 |
| C | 5.473314  | -4.082357 | -0.000413 |
| H | 6.279231  | -4.822203 | -0.000508 |

|   |           |           |           |
|---|-----------|-----------|-----------|
| H | 4.863127  | -4.270706 | -0.890698 |
| H | 4.863026  | -4.271040 | 0.889731  |
| C | 6.959235  | -2.511391 | -1.266917 |
| H | 7.469175  | -1.544527 | -1.307950 |
| H | 6.364185  | -2.618571 | -2.180055 |
| H | 7.730723  | -3.288292 | -1.273722 |
| C | 6.959095  | -2.511876 | 1.266849  |
| H | 7.469079  | -1.545054 | 1.308289  |
| H | 7.730546  | -3.288814 | 1.273466  |
| H | 6.363936  | -2.619356 | 2.179880  |
| C | 5.083834  | 2.348354  | 0.000168  |
| C | 6.625001  | 2.414877  | -0.000152 |
| H | 7.062562  | 1.948894  | 0.889663  |
| H | 6.937727  | 3.463325  | -0.000409 |
| H | 7.062199  | 1.948557  | -0.889970 |
| C | 4.579262  | 3.081462  | 1.270523  |
| H | 4.937521  | 2.585223  | 2.179512  |
| H | 3.489737  | 3.130459  | 1.307802  |
| H | 4.964228  | 4.106772  | 1.278753  |
| C | 4.578720  | 3.081618  | -1.269878 |
| H | 3.489178  | 3.130648  | -1.306665 |
| H | 4.936564  | 2.585474  | -2.179082 |
| H | 4.963707  | 4.106920  | -1.278160 |
| C | 0.000035  | 1.563685  | 2.051300  |
| H | -0.897273 | 1.201642  | 2.556089  |
| H | 0.001664  | 2.656091  | 2.066048  |
| H | 0.895884  | 1.199013  | 2.556802  |
| C | -0.000028 | 1.563690  | -2.051266 |
| H | -0.895829 | 1.198928  | -2.556788 |
| H | 0.897327  | 1.201738  | -2.556036 |
| H | -0.001769 | 2.656096  | -2.066011 |

## I<sup>-</sup>

|    |           |           |           |
|----|-----------|-----------|-----------|
| Sn | 0.000007  | -0.844627 | -0.000003 |
| O  | 2.207849  | -1.545704 | -0.000085 |
| O  | -2.207833 | -1.545706 | 0.000080  |
| N  | 1.340905  | 0.964386  | -0.000001 |
| N  | -1.340890 | 0.964383  | -0.000007 |
| C  | 3.125284  | -0.608675 | -0.000018 |
| C  | 2.715207  | 0.772700  | 0.000016  |
| C  | 3.667550  | 1.808777  | 0.000056  |
| H  | 3.316604  | 2.835174  | 0.000078  |
| C  | 5.036982  | 1.537148  | 0.000058  |
| C  | 5.428446  | 0.180788  | 0.000018  |
| H  | 6.491014  | -0.038520 | -0.000005 |
| C  | 4.530225  | -0.892365 | -0.000002 |
| C  | 6.109811  | 2.644043  | 0.000067  |
| C  | 7.001727  | 2.518606  | -1.260719 |
| H  | 6.400640  | 2.620520  | -2.171333 |
| H  | 7.504060  | 1.547189  | -1.304957 |
| H  | 7.775933  | 3.298026  | -1.271678 |

|   |           |           |           |
|---|-----------|-----------|-----------|
| C | 7.001596  | 2.518725  | 1.260958  |
| H | 6.400413  | 2.620705  | 2.171500  |
| H | 7.775788  | 3.298159  | 1.271933  |
| H | 7.503945  | 1.547321  | 1.305332  |
| C | 5.496576  | 4.059256  | -0.000030 |
| H | 4.877178  | 4.234018  | 0.886608  |
| H | 4.877289  | 4.233944  | -0.886760 |
| H | 6.294382  | 4.812334  | -0.000012 |
| C | 5.017842  | -2.355838 | -0.000071 |
| C | 4.497858  | -3.084941 | -1.264865 |
| H | 4.893372  | -2.612117 | -2.172437 |
| H | 3.407797  | -3.055014 | -1.306758 |
| H | 4.822582  | -4.134822 | -1.261608 |
| C | 4.497968  | -3.085044 | 1.264711  |
| H | 4.893601  | -2.612324 | 2.172286  |
| H | 4.822652  | -4.134938 | 1.261318  |
| H | 3.407914  | -3.055078 | 1.306729  |
| C | 6.557143  | -2.469184 | -0.000139 |
| H | 7.005936  | -2.008744 | 0.887925  |
| H | 7.005882  | -2.008356 | -0.888031 |
| H | 6.843469  | -3.528168 | -0.000377 |
| C | 0.699355  | 2.145308  | -0.000004 |
| H | 1.238826  | 3.090159  | -0.000005 |
| C | -0.699342 | 2.145307  | -0.000009 |
| H | -1.238815 | 3.090156  | -0.000013 |
| C | -3.125271 | -0.608679 | 0.000013  |
| C | -2.715192 | 0.772695  | -0.000023 |
| C | -3.667531 | 1.808776  | -0.000062 |
| H | -3.316582 | 2.835171  | -0.000081 |
| C | -5.036964 | 1.537151  | -0.000061 |
| C | -5.428432 | 0.180794  | -0.000017 |
| H | -6.491001 | -0.038515 | 0.000014  |
| C | -4.530217 | -0.892363 | 0.000001  |
| C | -6.109792 | 2.644049  | -0.000063 |
| C | -5.496557 | 4.059261  | -0.000009 |
| H | -6.294364 | 4.812339  | 0.000031  |
| H | -4.877225 | 4.234025  | -0.886693 |
| H | -4.877206 | 4.233949  | 0.886676  |
| C | -7.001613 | 2.518706  | -1.260926 |
| H | -7.503956 | 1.547299  | -1.305271 |
| H | -6.400456 | 2.620677  | -2.171487 |
| H | -7.775810 | 3.298135  | -1.271890 |
| C | -7.001673 | 2.518636  | 1.260750  |
| H | -7.504011 | 1.547222  | 1.305017  |
| H | -7.775874 | 3.298061  | 1.271719  |
| H | -6.400560 | 2.620560  | 2.171346  |
| C | -5.017874 | -2.355821 | 0.000076  |
| C | -6.557181 | -2.469078 | 0.000056  |
| H | -7.005948 | -2.008154 | 0.887885  |
| H | -6.843571 | -3.528044 | 0.000354  |
| H | -7.005890 | -2.008675 | -0.888071 |
| C | -4.498013 | -3.084919 | 1.264926  |



|   |           |           |           |
|---|-----------|-----------|-----------|
| H | -4.893552 | -2.612040 | 2.172460  |
| H | -3.407954 | -3.055064 | 1.306884  |
| H | -4.822808 | -4.134778 | 1.261683  |
| C | -4.497971 | -3.085084 | -1.264662 |
| H | -3.407914 | -3.055178 | -1.306625 |
| H | -4.893532 | -2.612365 | -2.172270 |
| H | -4.822711 | -4.134960 | -1.261262 |
| C | 0.000019  | -1.552372 | 2.055435  |
| H | 0.900221  | -1.197684 | 2.563508  |
| H | -0.000545 | -2.646510 | 2.058211  |
| H | -0.899690 | -1.196796 | 2.563767  |
| C | 0.000002  | -1.552374 | -2.055441 |
| H | 0.899698  | -1.196774 | -2.563777 |
| H | -0.900212 | -1.197712 | -2.563509 |
| H | 0.000597  | -2.646512 | -2.058215 |

### 1-Py

|    |           |           |           |
|----|-----------|-----------|-----------|
| Sn | 0.000032  | 0.426681  | -0.000081 |
| O  | 2.216307  | 0.978866  | 0.062280  |
| O  | -2.216346 | 0.978914  | -0.062335 |
| N  | 1.353918  | -1.542651 | 0.029259  |
| N  | -1.353999 | -1.542652 | -0.029515 |
| C  | 3.119421  | 0.036641  | 0.030788  |
| C  | 2.719456  | -1.346709 | 0.023001  |
| C  | 3.672532  | -2.392461 | -0.001866 |
| H  | 3.320860  | -3.418120 | -0.003921 |
| C  | 5.027225  | -2.122116 | -0.025593 |
| C  | 5.413854  | -0.751352 | -0.028294 |
| H  | 6.476010  | -0.537949 | -0.053662 |
| C  | 4.535829  | 0.322581  | -0.002110 |
| C  | 6.108432  | -3.217059 | -0.051382 |
| C  | 7.022540  | -3.079060 | 1.191732  |
| H  | 6.444955  | -3.188519 | 2.116302  |
| H  | 7.523125  | -2.106395 | 1.226206  |
| H  | 7.800757  | -3.851773 | 1.183001  |
| C  | 6.966797  | -3.075078 | -1.333190 |
| H  | 6.348673  | -3.181787 | -2.231491 |
| H  | 7.744916  | -3.847491 | -1.361641 |
| H  | 7.465101  | -2.102107 | -1.386849 |
| C  | 5.503536  | -4.635026 | -0.039832 |
| H  | 4.871619  | -4.817509 | -0.916169 |
| H  | 4.905206  | -4.816772 | 0.859929  |
| H  | 6.306013  | -5.380756 | -0.054940 |
| C  | 5.044746  | 1.778096  | 0.001297  |
| C  | 4.624948  | 2.467879  | 1.323062  |
| H  | 5.089629  | 1.973061  | 2.183795  |
| H  | 3.542941  | 2.435446  | 1.454363  |
| H  | 4.945607  | 3.517315  | 1.323389  |
| C  | 4.462343  | 2.551955  | -1.208331 |
| H  | 4.777282  | 2.088416  | -2.150621 |
| H  | 4.829513  | 3.585999  | -1.204989 |

|   |           |           |           |
|---|-----------|-----------|-----------|
| H | 3.372279  | 2.569557  | -1.182639 |
| C | 6.582886  | 1.866635  | -0.094257 |
| H | 6.967239  | 1.419125  | -1.017764 |
| H | 7.082502  | 1.387846  | 0.755374  |
| H | 6.883182  | 2.920392  | -0.093282 |
| C | 0.718348  | -2.684352 | 0.011780  |
| H | 1.233327  | -3.645772 | 0.010608  |
| C | -0.718437 | -2.684368 | -0.012283 |
| H | -1.233404 | -3.645793 | -0.011303 |
| C | -3.119445 | 0.036727  | -0.030795 |
| C | -2.719502 | -1.346662 | -0.023124 |
| C | -3.672619 | -2.392395 | 0.001805  |
| H | -3.320963 | -3.418060 | 0.003832  |
| C | -5.027291 | -2.122031 | 0.025680  |
| C | -5.413905 | -0.751245 | 0.028452  |
| H | -6.476060 | -0.537843 | 0.053926  |
| C | -4.535885 | 0.322668  | 0.002223  |
| C | -6.108523 | -3.216946 | 0.051517  |
| C | -5.503659 | -4.634928 | 0.040105  |
| H | -6.306155 | -5.380637 | 0.055243  |
| H | -4.871772 | -4.817335 | 0.916480  |
| H | -4.905308 | -4.816781 | -0.859620 |
| C | -6.966954 | -3.074886 | 1.333271  |
| H | -7.465262 | -2.101915 | 1.386875  |
| H | -6.348882 | -3.181573 | 2.231611  |
| H | -7.745083 | -3.847289 | 1.361707  |
| C | -7.022559 | -3.078987 | -1.191656 |
| H | -7.523107 | -2.106303 | -1.226188 |
| H | -7.800798 | -3.851678 | -1.182945 |
| H | -6.444919 | -3.188491 | -2.116187 |
| C | -5.044756 | 1.778193  | -0.001052 |
| C | -6.582898 | 1.866751  | 0.094518  |
| H | -7.082525 | 1.388036  | -0.755148 |
| H | -6.883189 | 2.920509  | 0.093638  |
| H | -6.967251 | 1.419166  | 1.017990  |
| C | -4.624945 | 2.468089  | -1.322758 |
| H | -5.089514 | 1.973259  | -2.183544 |
| H | -3.542927 | 2.435801  | -1.453988 |
| H | -4.945730 | 3.517485  | -1.323044 |
| C | -4.462314 | 2.551926  | 1.208629  |
| H | -3.372248 | 2.569447  | 1.182960  |
| H | -4.777306 | 2.088363  | 2.150889  |
| H | -4.829402 | 3.585999  | 1.205335  |
| C | 0.078103  | 0.523542  | -2.174679 |
| H | 0.606197  | 1.428155  | -2.484395 |
| H | -0.931901 | 0.519021  | -2.591023 |
| H | 0.627246  | -0.345562 | -2.546135 |
| C | -0.078638 | 0.523526  | 2.174508  |
| H | 0.931168  | 0.515747  | 2.591290  |
| H | -0.630858 | -0.343788 | 2.545556  |
| H | -0.603902 | 1.429830  | 2.484095  |
| N | 0.000313  | 2.980222  | -0.000233 |

|   |           |          |           |
|---|-----------|----------|-----------|
| C | 0.793256  | 3.668389 | 0.836813  |
| C | -0.792691 | 3.668490 | -0.837135 |
| C | 0.823770  | 5.063180 | 0.874379  |
| H | 1.426054  | 3.074939 | 1.488227  |
| C | -0.823337 | 5.063286 | -0.874410 |
| H | -1.425425 | 3.075152 | -1.488708 |
| C | 0.000179  | 5.776425 | 0.000063  |
| H | 1.484056  | 5.569666 | 1.572303  |
| H | -1.483669 | 5.569855 | -1.572231 |
| H | 0.000122  | 6.863761 | 0.000185  |
